# Supplementary material for: Endovascular Treatment for Acute Thromboembolic Occlusion of the Superior Mesenteric Artery and the Outcome Comparison between Endovascular and Open Surgical Treatments: A Retrospective Study
Source: Hindawi journal article supplement (doi:10.1155/2017/1964765), 2017-01-01
Supplement: f1 [file 1964765.f1.pdf]

**Table S1 Open surgical treatment**

| Treatment means                                            | Treatment time                                                  |
|------------------------------------------------------------|-----------------------------------------------------------------|
| Thrombolysis with anticoagulants and blood vessel dilation | Used after the confirmation of ATOS                             |
| Intestinal resection                                       | Surgeries determined by the observed intra-operative conditions |
| Arterial embolectomy                                       |                                                                 |
| Intestinal fistulation                                     |                                                                 |
| Delayed abdominal closure                                  |                                                                 |
| Systemic anticoagulation and thrombolysis                  | After surgical intervention                                     |
| A second surgical procedure                                | If intestinal necrosis occurred                                 |
